# Supplementary material
Source: PubMed Central journal article supplement (PMC10087093)
Supplement: jama-e234800-s002.pdf [file jama-e234800-s002.pdf]

Supplemental Online Content: Nonauthor Collaborators

\*First name, last name, and suffix (if applicable) are required and will appear in PubMed.

| <b>*Group Name(s): 2018 NHBS Study Group</b> |                   |                              |                  |             |                                          |                                                         |                                                                                            |
|----------------------------------------------|-------------------|------------------------------|------------------|-------------|------------------------------------------|---------------------------------------------------------|--------------------------------------------------------------------------------------------|
| <b>*First Name and Middle Initial(s)</b>     | <b>*Last Name</b> | <b>*Suffix (eg, Jr, III)</b> | Academic Degrees | Institution | Location (city, state/province, country) | Role or Contribution, eg, chair, principal investigator | Group (if more than 1 Group listed in the byline) and/or Subgroup (eg, Steering Committee) |
| Pascale                                      | Wortley           |                              |                  |             |                                          |                                                         | NHBS Study Group                                                                           |
| Jeff                                         | Todd              |                              |                  |             |                                          |                                                         | NHBS Study Group                                                                           |
| David                                        | Melton            |                              |                  |             |                                          |                                                         | NHBS Study Group                                                                           |
| Colin                                        | Flynn             |                              |                  |             |                                          |                                                         | NHBS Study Group                                                                           |
| Danielle                                     | German            |                              |                  |             |                                          |                                                         | NHBS Study Group                                                                           |
| Monina                                       | Klevens           |                              |                  |             |                                          |                                                         | NHBS Study Group                                                                           |
| Rose                                         | Doherty           |                              |                  |             |                                          |                                                         | NHBS Study Group                                                                           |
| Conall                                       | O'Cleirigh        |                              |                  |             |                                          |                                                         | NHBS Study Group                                                                           |
| Antonio                                      | Jimenez           |                              |                  |             |                                          |                                                         | NHBS Study Group                                                                           |
| Thomas                                       | Clyde             |                              |                  |             |                                          |                                                         | NHBS Study Group                                                                           |
| Jonathon                                     | Poe               |                              |                  |             |                                          |                                                         | NHBS Study Group                                                                           |
| Margaret                                     | Vaaler            |                              |                  |             |                                          |                                                         | NHBS Study Group                                                                           |
| Jie                                          | Deng              |                              |                  |             |                                          |                                                         | NHBS Study Group                                                                           |
| Alia                                         | Al-Tayyib         |                              |                  |             |                                          |                                                         | NHBS Study Group                                                                           |
| Danielle                                     | Shodell           |                              |                  |             |                                          |                                                         | NHBS Study Group                                                                           |
| Emily                                        | Higgins           |                              |                  |             |                                          |                                                         | NHBS Study Group                                                                           |
| Vivian                                       | Griffin           |                              |                  |             |                                          |                                                         | NHBS Study Group                                                                           |
| Corrine                                      | Sanger            |                              |                  |             |                                          |                                                         | NHBS Study Group                                                                           |
| Salma                                        | Khuwaja           |                              |                  |             |                                          |                                                         | NHBS Study Group                                                                           |
| Zaida                                        | Lopez             |                              |                  |             |                                          |                                                         | NHBS Study Group                                                                           |
| Paige                                        | Padgett           |                              |                  |             |                                          |                                                         | NHBS Study Group                                                                           |
| Ekow                                         | Kwa Sey           |                              |                  |             |                                          |                                                         | NHBS Study Group                                                                           |
| Yingbo                                       | Ma                |                              |                  |             |                                          |                                                         | NHBS Study Group                                                                           |
| Hugo                                         | Santacruz         |                              |                  |             |                                          |                                                         | NHBS Study Group                                                                           |
| Meredith                                     | Brantley          |                              |                  |             |                                          |                                                         | NHBS Study Group                                                                           |
| Christopher                                  | Mathews           |                              |                  |             |                                          |                                                         | NHBS Study Group                                                                           |
| Jack                                         | Marr              |                              |                  |             |                                          |                                                         | NHBS Study Group                                                                           |
| Emma                                         | Spencer           |                              |                  |             |                                          |                                                         | NHBS Study Group                                                                           |
| Willie                                       | Nixon             |                              |                  |             |                                          |                                                         | NHBS Study Group                                                                           |

Supplemental Online Content: Nonauthor Collaborators

\*First name, last name, and suffix (if applicable) are required and will appear in PubMed.

| *First Name and Middle Initial(s) | *Last Name      | *Suffix (eg, Jr, III) | Academic Degrees | Institution | Location (city, state/province, country) | Role or Contribution, eg, chair, principal investigator | Group (if more than 1 Group listed in the byline) and/or Subgroup (eg, Steering Committee) |
|-----------------------------------|-----------------|-----------------------|------------------|-------------|------------------------------------------|---------------------------------------------------------|--------------------------------------------------------------------------------------------|
| David                             | Forrest         |                       |                  |             |                                          |                                                         | NHBS Study Group                                                                           |
| Bridget                           | Anderson        |                       |                  |             |                                          |                                                         | NHBS Study Group                                                                           |
| Ashley                            | Tate            |                       |                  |             |                                          |                                                         | NHBS Study Group                                                                           |
| Meaghan                           | Abrego          |                       |                  |             |                                          |                                                         | NHBS Study Group                                                                           |
| William T.                        | Robinson        |                       |                  |             |                                          |                                                         | NHBS Study Group                                                                           |
| Narquis                           | Barak           |                       |                  |             |                                          |                                                         | NHBS Study Group                                                                           |
| Jeremy M.                         | Beckford        |                       |                  |             |                                          |                                                         | NHBS Study Group                                                                           |
| Sarah                             | Braunstein      |                       |                  |             |                                          |                                                         | NHBS Study Group                                                                           |
| Alexis                            | Rivera          |                       |                  |             |                                          |                                                         | NHBS Study Group                                                                           |
| Sidney                            | Carrillo        |                       |                  |             |                                          |                                                         | NHBS Study Group                                                                           |
| Abdel R.                          | Ibrahim         |                       |                  |             |                                          |                                                         | NHBS Study Group                                                                           |
| Afework                           | Wogayehu        |                       |                  |             |                                          |                                                         | NHBS Study Group                                                                           |
| Luis                              | Moraga          |                       |                  |             |                                          |                                                         | NHBS Study Group                                                                           |
| Kathleen A.                       | Brady           |                       |                  |             |                                          |                                                         | NHBS Study Group                                                                           |
| Jennifer                          | Shinefeld       |                       |                  |             |                                          |                                                         | NHBS Study Group                                                                           |
| Chrysanthus                       | Nnumolu         |                       |                  |             |                                          |                                                         | NHBS Study Group                                                                           |
| Timothy W.                        | Menza           |                       |                  |             |                                          |                                                         | NHBS Study Group                                                                           |
| E. Roberto                        | Orellana        |                       |                  |             |                                          |                                                         | NHBS Study Group                                                                           |
| Amisha                            | Bhattari        |                       |                  |             |                                          |                                                         | NHBS Study Group                                                                           |
| Anna                              | Flynn           |                       |                  |             |                                          |                                                         | NHBS Study Group                                                                           |
| Onika                             | Chambers        |                       |                  |             |                                          |                                                         | NHBS Study Group                                                                           |
| Marisa                            | Ramos           |                       |                  |             |                                          |                                                         | NHBS Study Group                                                                           |
| Will                              | McFarland       |                       |                  |             |                                          |                                                         | NHBS Study Group                                                                           |
| Jessica                           | Lin             |                       |                  |             |                                          |                                                         | NHBS Study Group                                                                           |
| Desmond                           | Miller          |                       |                  |             |                                          |                                                         | NHBS Study Group                                                                           |
| Sandra                            | Miranda De Leon |                       |                  |             |                                          |                                                         | NHBS Study Group                                                                           |
| Yadira                            | Rolon-Colon     |                       |                  |             |                                          |                                                         | NHBS Study Group                                                                           |
| Maria P.                          | Martinez        |                       |                  |             |                                          |                                                         | NHBS Study Group                                                                           |
| Tom                               | Jaenicke        |                       |                  |             |                                          |                                                         | NHBS Study Group                                                                           |
| Saral                             | Glick           |                       |                  |             |                                          |                                                         | NHBS Study Group                                                                           |

Supplemental Online Content: Nonauthor Collaborators

\*First name, last name, and suffix (if applicable) are required and will appear in PubMed.

| *First Name and Middle Initial(s) | *Last Name      | *Suffix (eg, Jr, III) | Academic Degrees | Institution | Location (city, state/province, country) | Role or Contribution, eg, chair, principal investigator | Group (if more than 1 Group listed in the byline) and/or Subgroup (eg, Steering Committee) |
|-----------------------------------|-----------------|-----------------------|------------------|-------------|------------------------------------------|---------------------------------------------------------|--------------------------------------------------------------------------------------------|
| Jennifer                          | Kienzle         |                       |                  |             |                                          |                                                         | NHBS Study Group                                                                           |
| Brandie                           | Smith           |                       |                  |             |                                          |                                                         | NHBS Study Group                                                                           |
| Toyah                             | Reid            |                       |                  |             |                                          |                                                         | NHBS Study Group                                                                           |
| Jenevieve                         | Opoku           |                       |                  |             |                                          |                                                         | NHBS Study Group                                                                           |
| Irene                             | Kuo             |                       |                  |             |                                          |                                                         | NHBS Study Group                                                                           |
| Monica                            | Adams           |                       |                  |             |                                          |                                                         | NHBS Study Group                                                                           |
| Amy                               | Baughner        |                       |                  |             |                                          |                                                         | NHBS Study Group                                                                           |
| Dita                              | Broz            |                       |                  |             |                                          |                                                         | NHBS Study Group                                                                           |
| Janet                             | Burnett         |                       |                  |             |                                          |                                                         | NHBS Study Group                                                                           |
| Susan                             | Chambers        |                       |                  |             |                                          |                                                         | NHBS Study Group                                                                           |
| Johanna                           | Chapin-Bardales |                       |                  |             |                                          |                                                         | NHBS Study Group                                                                           |
| Paul                              | Denning         |                       |                  |             |                                          |                                                         | NHBS Study Group                                                                           |
| Teresa                            | Finlayson       |                       |                  |             |                                          |                                                         | NHBS Study Group                                                                           |
| Senad                             | Handanagic      |                       |                  |             |                                          |                                                         | NHBS Study Group                                                                           |
| Terence                           | Hickey          |                       |                  |             |                                          |                                                         | NHBS Study Group                                                                           |
| Dafna                             | Kanny           |                       |                  |             |                                          |                                                         | NHBS Study Group                                                                           |
| Kathryn                           | Lee             |                       |                  |             |                                          |                                                         | NHBS Study Group                                                                           |
| Rashunda                          | Lewis           |                       |                  |             |                                          |                                                         | NHBS Study Group                                                                           |
| Elana                             | Morris          |                       |                  |             |                                          |                                                         | NHBS Study Group                                                                           |
| Evelyn                            | Olansky         |                       |                  |             |                                          |                                                         | NHBS Study Group                                                                           |
| Taylor                            | Robbins         |                       |                  |             |                                          |                                                         | NHBS Study Group                                                                           |
| Catlainn                          | Sionean         |                       |                  |             |                                          |                                                         | NHBS Study Group                                                                           |
| Amanda                            | Smith           |                       |                  |             |                                          |                                                         | NHBS Study Group                                                                           |
| Anna                              | Teplinskaya     |                       |                  |             |                                          |                                                         | NHBS Study Group                                                                           |
| Kindsay                           | Trujillo        |                       |                  |             |                                          |                                                         | NHBS Study Group                                                                           |
| Cyprian                           | Wejnert         |                       |                  |             |                                          |                                                         | NHBS Study Group                                                                           |
| Ari                               | Whiteman        |                       |                  |             |                                          |                                                         | NHBS Study Group                                                                           |
| Mingjing                          | Xia             |                       |                  |             |                                          |                                                         | NHBS Study Group                                                                           |
