# Supplementary material
Source: PubMed Central journal article supplement (PMC10087093)
Supplement: jama-e234800-s003.pdf [file jama-e234800-s003.pdf]

## **Data Sharing Statement**

### **Data**

**Data available:** No

### **Additional Information**

**Explanation for why data not available:** There is no data collected for this study as it is a modeling study.
